# Supplementary material for: CQDs/ZnO composites based on waste rice noodles: preparation and photocatalytic capability
Source: Royal Society of Chemistry journal article supplement (doi:10.1039/d2ra03709b), 2022-01-01
Supplement: d2ra03709b1.pdf [file d2ra03709b1.pdf]

## Supporting information

### **CQDs/ZnO Composite Based on Waste Rice Noodles: Preparation and Photocatalytic Capability**

*Xin-Yan Jin, Wan-ying Ying, Rui-jie Che, Ping Xiao, Yu-Qing Zhou, Yan Liu, Meng-Yu Liu and Shuo-ping Chen\**

College of Materials Science and Engineering, Guilin University of Technology, Guilin 541004, China.

\*Corresponding author. Email: [chenshuoping\\_777@163.com](mailto:chenshuoping_777@163.com) (S. P. Chen)

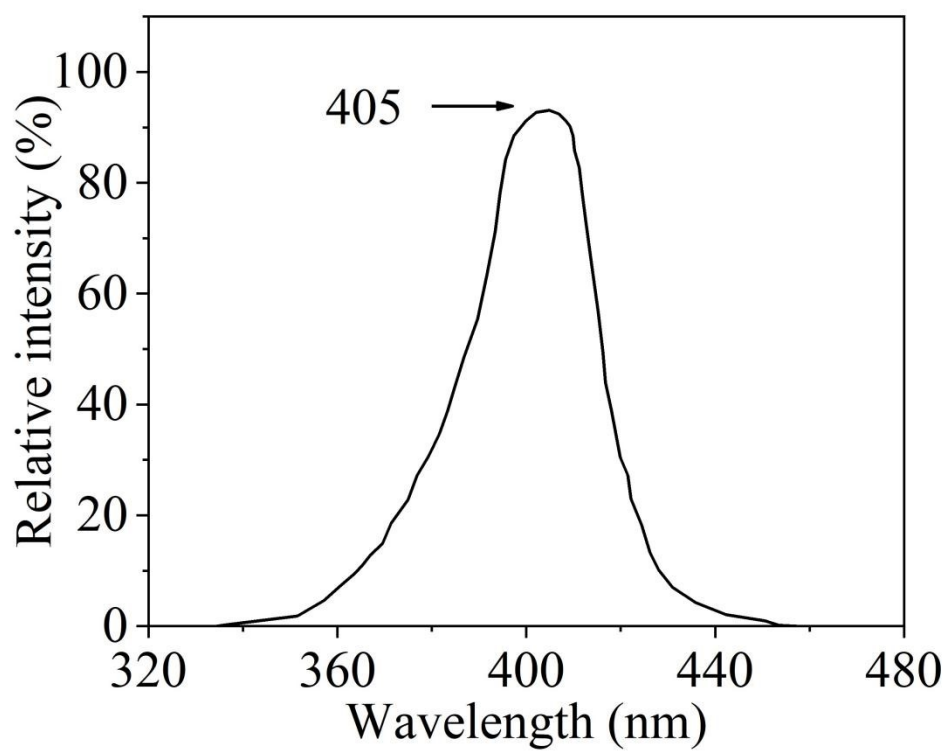

**Figure S-1** The emission spectrum of the 405 nm purple light lamp.

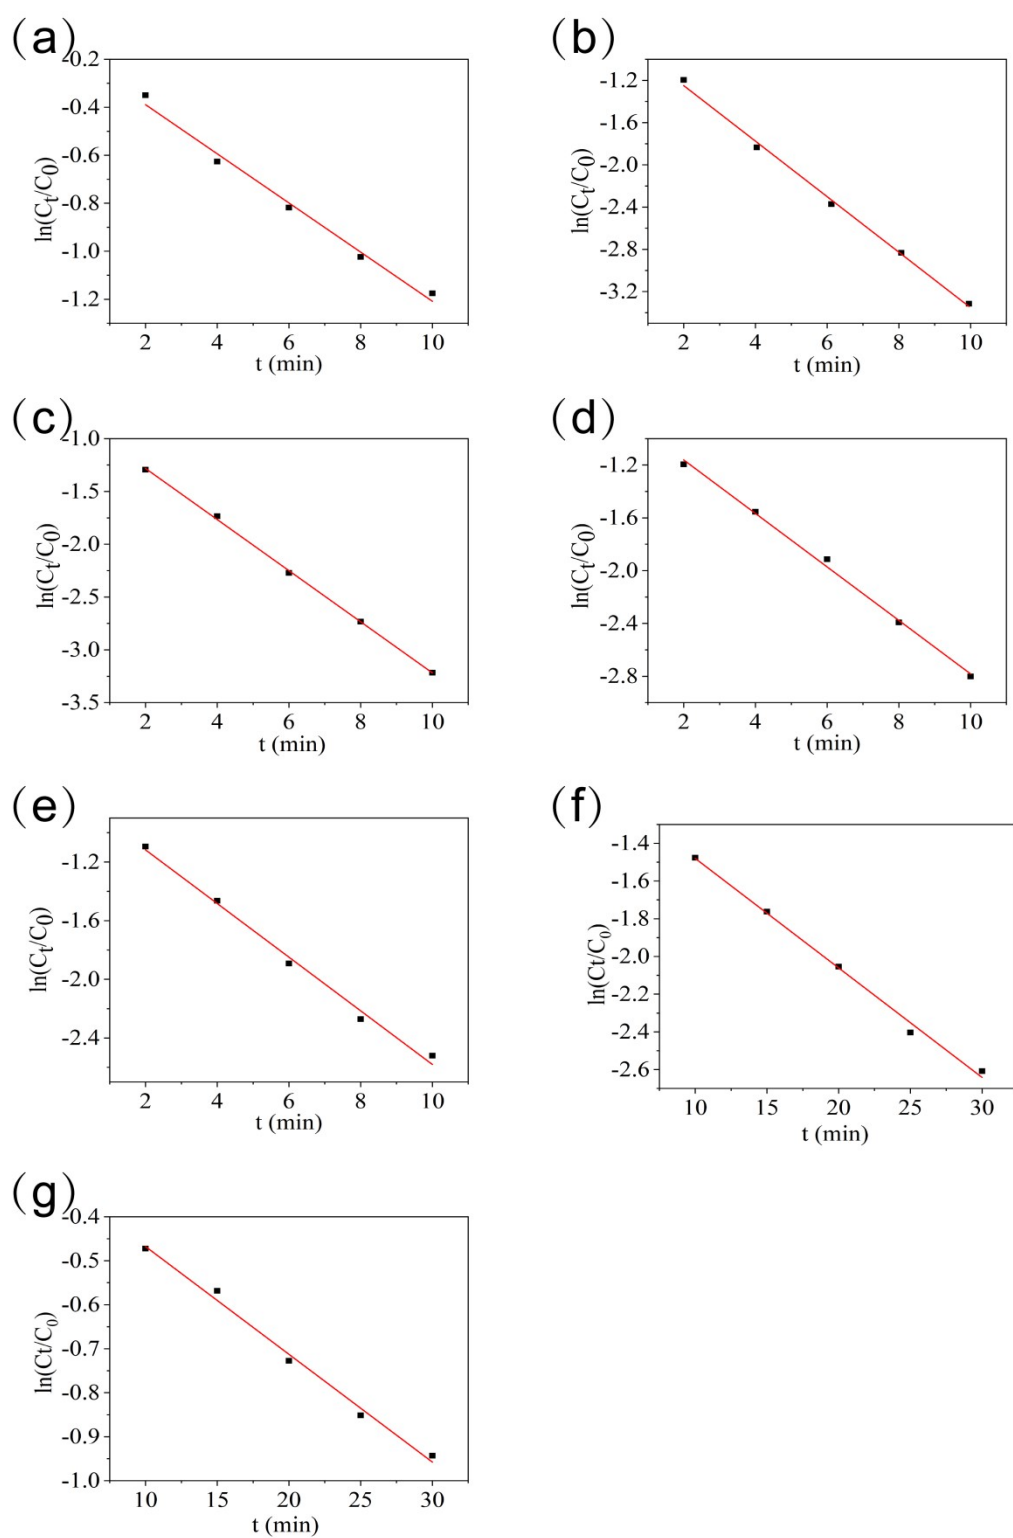

**Figure S-2** The pseudo-first-order kinetic fitting of photocatalytic degradation of CQDs/ZnO-1 sample (a), CQDs/ZnO-2 sample (b), CQDs/ZnO-3 sample (c), CQDs/ZnO-4 sample (d), CQDs/ZnO-5 sample (e), CQDs/TiO<sub>2</sub> (f) and commercial ZnO (g) to methylene blue within different irradiation times under 405 nm purple light.

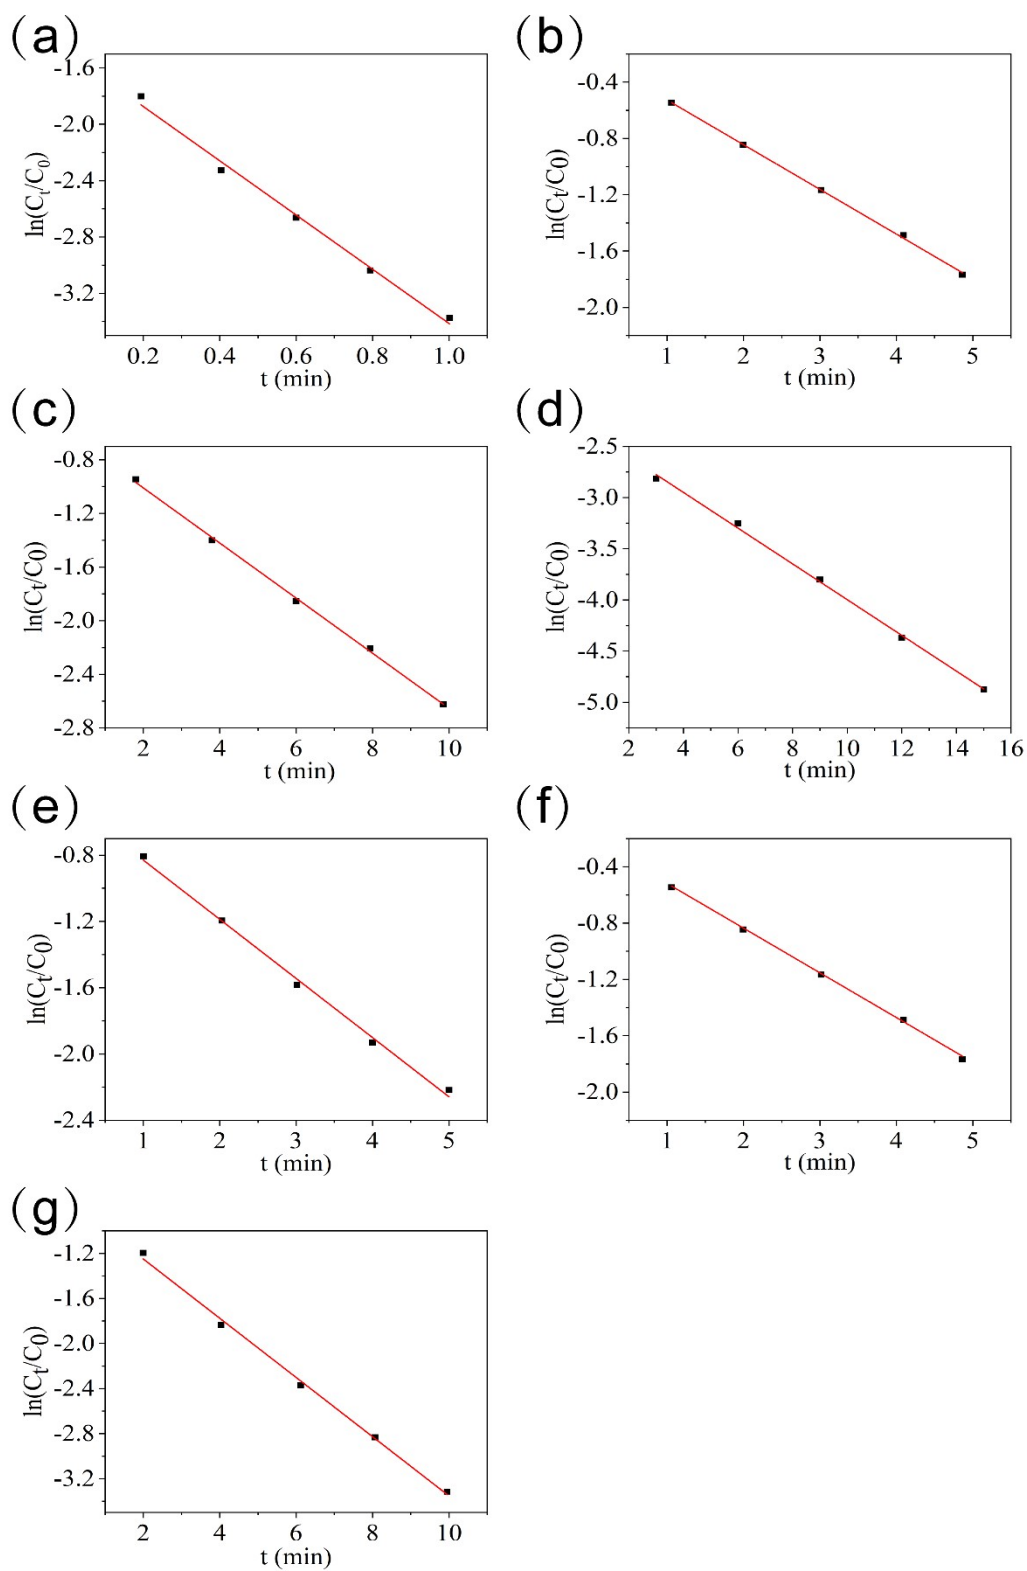

**Figure S-3** The pseudo-first-order kinetic fitting of photocatalytic degradation of CQDs/ZnO composite to malachite green (a), methyl violet (b), basic fuchsin (c), rhodamine B (d), tetracycline (e), aniline (f) and methylene blue (g) within different irradiation times under 405 nm purple light.

**Table S-1** The kinetic parameters obtained for the photocatalytic degradation of different photocatalysts under 405 nm purple light.

| <b>Photocatalysts</b> | <b><math>K_{app}</math> (<math>\text{min}^{-1}</math>)</b> | <b><math>R^2</math></b> |
|-----------------------|------------------------------------------------------------|-------------------------|
| CQDs/ZnO-1            | 0.1024±0.0061                                              | 0.9895                  |
| CQDs/ZnO-2            | 0.2630±0.0081                                              | 0.9972                  |
| CQDs/ZnO-3            | 0.2420±0.0037                                              | 0.9993                  |
| CQDs/ZnO-4            | 0.2026±0.0067                                              | 0.9968                  |
| CQDs/ZnO-5            | 0.1829±0.0089                                              | 0.9930                  |
| CQDs/TiO <sub>2</sub> | 0.0581±0.0023                                              | 0.9953                  |
| ZnO                   | 0.0243±0.0013                                              | 0.9924                  |

**Table S-2** The kinetic parameters obtained for the photocatalytic degradation of various organic pollutants under 405 nm purple light.

| <b>Organic pollutants</b> | <b>K<sub>app</sub> (min<sup>-1</sup>)</b> | <b>R<sup>2</sup></b> |
|---------------------------|-------------------------------------------|----------------------|
| methylene blue            | 0.2630±0.0081                             | 0.9963               |
| malachite green           | 1.9260±0.0910                             | 0.9911               |
| methyl violet             | 0.3175±0.0088                             | 0.9970               |
| basic fuchsin             | 0.2056±0.0041                             | 0.9984               |
| rhodamine B               | 0.1745±0.0041                             | 0.9978               |
| tetracycline              | 0.3573±0.0119                             | 0.9956               |
| aniline                   | 0.0187±0.0001                             | 0.9971               |
